# Supplementary material for: In situ-forming click-crosslinked gelatin based hydrogels for 3D culture of thymic epithelial cells
Source: Royal Society of Chemistry journal article supplement (doi:10.1039/c6bm00254d), 2016-01-01
Supplement: c6bm00254d2.pdf [file c6bm00254d2.pdf]

## In situ-forming click-crosslinked gelatin based hydrogels for 3D culture of thymic epithelial cells

Vinh X. Truong <sup>a,‡</sup>, Michael L. Hun <sup>b,‡</sup>, Fanyi Li <sup>a</sup>, Ann P. Chidgey <sup>b,\*</sup>, John S. Forsythe <sup>a,\*</sup>

<sup>a</sup> Department of Material Science and Engineering, Monash Institute of Medical Engineering, Monash University, Victoria 3800, Australia

<sup>b</sup> Stem Cells and Immune Regeneration Laboratory, Department of Anatomy and Developmental Biology, Monash University, Victoria 3800, Australia

<sup>‡</sup> These authors contributed equally

<sup>\*</sup> Equal corresponding authors.

### Supplementary Information

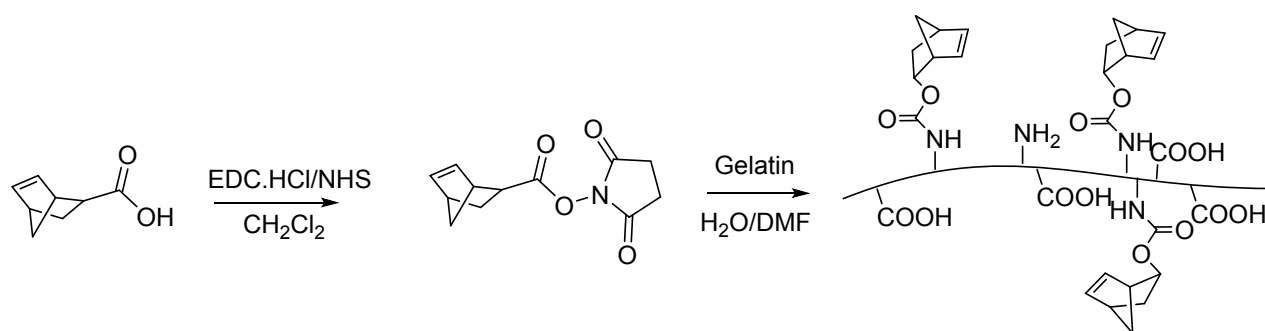

**Fig. S1.** Synthesis scheme of Gelatin-Nb

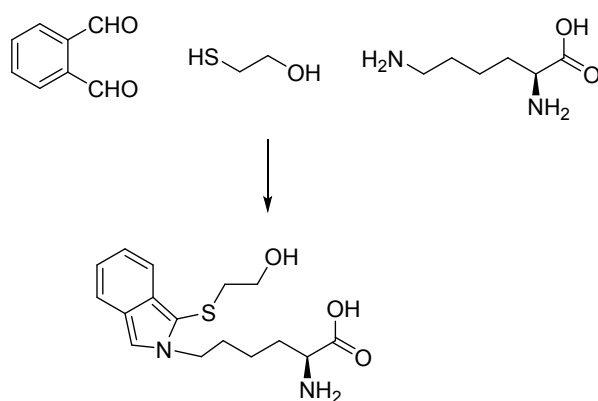

**Fig. S2.** Reaction scheme for the fluoraldehyde assay of primary amines using lysine as the standard.

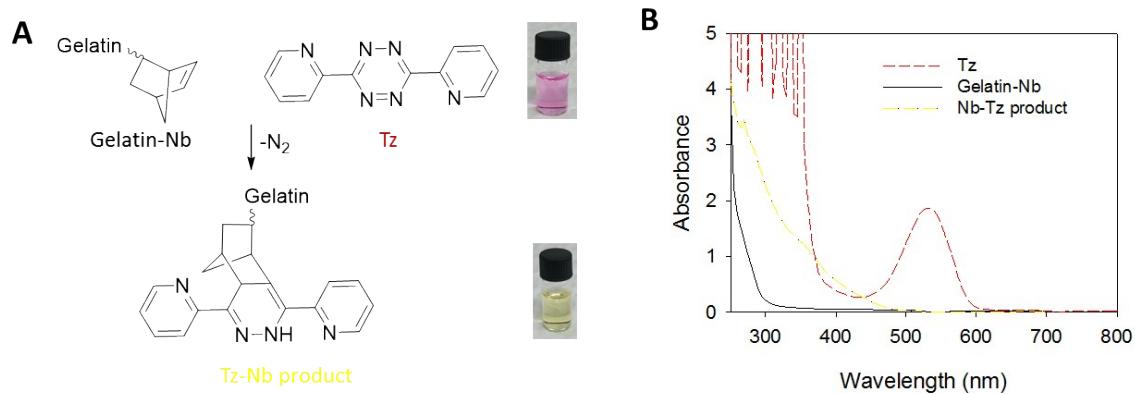

**Fig. S3. (A)** Reaction scheme of the titration of gelatin-Nb with a reactive tetrazine (Tz) solution, Tz solution in DMF/water (3/2 v/v, 1  $\mu$ M) was slowly added to a solution of gelatin-Nb in DMF/water (3/2 v/v, 1 wt%) under rapid stirring, the end point was decided when the mixing solution did not change colour from purple to yellow, this was also confirmed by UV-Vis scan ; **(B)** UV-Vis scan of the Gelatin-Nb, reactive Tz and Nb-Tz product solutions.
